# Supplementary material for: Dieckol and Its Derivatives as Potential Inhibitors of SARS-CoV-2 Spike Protein (UK Strain: VUI 202012/01): A Computational Study
Source: MDPI journal article supplement (doi:10.3390/md19050242), 2021-04-25
Supplement: s1 [file s1]

## **Supplementary Data**

### **Discovery of high-affinity SARS-CoV-2 (UK strain: VUI 202012/01) Spike protein inhibitors from marine algae database using computational approaches**

Mohammad Aatif<sup>1\*</sup>, Ghazala Muteeb<sup>2</sup>, Abdulrahman Alsultan<sup>3</sup>,

Adil Alshoaibi<sup>4</sup> and Bachir Yahia Khelif<sup>1</sup>

<sup>1</sup>Department of Public Health, College of Applied Medical Science, King Faisal University, Al-Ahsa 31982, Saudi Arabia

<sup>2</sup>Department of Nursing, College of Applied Medical Science, King Faisal University, Al-Ahsa 31982, Saudi Arabia

<sup>3</sup>College of Applied Medical Science, King Faisal University, Al-Ahsa 31982, Saudi Arabia

<sup>4</sup>Department of Physics, College of Science, King Faisal University, Al-Ahsa 31982, Saudi Arabia

**Running Title:** Marine-derived inhibitors of SARS-CoV-2 Spike protein

#### **\*Corresponding author**

***Dr. Mohammad Aatif***

(Corresponding author)

Department of Public Health

College of Applied Medical Science

King Faisal University

Al-Ahsa 31982

Saudi Arabia

**Phone:** +966560744262

**E-mail:** [maahmad@kfu.edu.sa](mailto:maahmad@kfu.edu.sa)

**Supplementary Table S1: Standard-precision (SP) molecular docking of selected ligands (having  $\leq -4.000$  kcal mol<sup>-1</sup> in HTVS) against RBD of spike protein**

| S. No. | Compound ID | Docking score (kcal mol <sup>-1</sup> ) | Glide g-score (kcal mol <sup>-1</sup> ) | Glide e-model (kcal mol <sup>-1</sup> ) | Glide energy (kcal mol <sup>-1</sup> ) |
|--------|-------------|-----------------------------------------|-----------------------------------------|-----------------------------------------|----------------------------------------|
| 1.     | GA007       | -6.951                                  | -6.951                                  | -85.102                                 | -66.702                                |
| 2.     | GA004       | -6.936                                  | -6.936                                  | -84.334                                 | -58.483                                |
| 3.     | GA005       | -6.685                                  | -6.685                                  | -69.120                                 | -54.462                                |
| 4.     | GA006       | -6.348                                  | -6.348                                  | -70.391                                 | -58.024                                |
| 5.     | BE011       | -5.098                                  | -5.390                                  | -62.335                                 | -46.496                                |
| 6.     | BU002       | -4.750                                  | -4.750                                  | -29.629                                 | -23.116                                |
| 7.     | RL392       | -4.665                                  | -4.665                                  | -25.053                                 | -19.800                                |
| 8.     | RL425       | -4.614                                  | -4.614                                  | -26.187                                 | -20.572                                |
| 9.     | RP008       | -4.613                                  | -4.826                                  | -24.097                                 | -17.866                                |
| 10.    | BS007       | -4.600                                  | -4.600                                  | -36.266                                 | -29.534                                |
| 11.    | BE006       | -4.599                                  | -4.642                                  | -21.174                                 | -16.831                                |
| 12.    | BE012       | -4.499                                  | -4.645                                  | -59.140                                 | -43.493                                |
| 13.    | RR025       | -4.456                                  | -4.585                                  | -37.792                                 | -29.504                                |
| 14.    | RL249       | -4.452                                  | -4.452                                  | -20.063                                 | -17.600                                |
| 15.    | RP011       | -4.423                                  | -4.496                                  | -30.088                                 | -23.769                                |
| 16.    | GA010       | -4.417                                  | -4.491                                  | -29.604                                 | -23.164                                |
| 17.    | BU005       | -4.405                                  | -4.405                                  | -23.387                                 | -18.777                                |
| 18.    | RP063       | -4.391                                  | -4.391                                  | -20.644                                 | -16.329                                |
| 19.    | GA011       | -4.371                                  | -5.132                                  | -54.028                                 | -43.042                                |
| 20.    | RP017       | -4.365                                  | -4.766                                  | -32.479                                 | -25.734                                |
| 21.    | BS017       | -4.353                                  | -4.366                                  | -55.937                                 | -46.160                                |
| 22.    | RR040       | -4.341                                  | -4.742                                  | -32.352                                 | -25.620                                |
| 23.    | RJ007       | -4.334                                  | -4.334                                  | -38.051                                 | -33.370                                |
| 24.    | RL462       | -4.307                                  | -4.307                                  | -31.220                                 | -25.248                                |
| 25.    | BE013       | -4.272                                  | -4.410                                  | -39.983                                 | -30.576                                |
| 26.    | BS008       | -4.269                                  | -4.269                                  | -28.960                                 | -24.405                                |
| 27.    | RJ006       | -4.232                                  | -4.232                                  | -36.463                                 | -32.435                                |
| 28.    | RR065       | -4.225                                  | -4.230                                  | -31.801                                 | -23.120                                |
| 29.    | RL343       | -4.181                                  | -4.181                                  | -30.186                                 | -24.726                                |
| 30.    | RR052       | -4.178                                  | -4.632                                  | -40.784                                 | -32.553                                |
| 31.    | RL280       | -4.176                                  | -4.177                                  | -25.038                                 | -20.233                                |
| 32.    | RP004       | -4.176                                  | -4.435                                  | -25.665                                 | -18.352                                |
| 33.    | RL391       | -4.175                                  | -4.175                                  | -21.782                                 | -17.367                                |
| 34.    | RL077       | -4.163                                  | -4.163                                  | -24.610                                 | -19.739                                |
| 35.    | BE008       | -4.119                                  | -4.811                                  | -53.817                                 | -40.410                                |
| 36.    | RR066       | -4.115                                  | -4.135                                  | -32.503                                 | -26.324                                |

|     |       |        |        |         |         |
|-----|-------|--------|--------|---------|---------|
| 37. | BS005 | -4.105 | -4.105 | -22.296 | -21.748 |
| 38. | RP005 | -4.104 | -4.161 | -27.309 | -22.388 |
| 39. | RL461 | -4.101 | -4.101 | -28.001 | -22.982 |
| 40. | BL017 | -4.086 | -4.165 | -30.856 | -21.581 |
| 41. | RR007 | -4.076 | -4.082 | -31.196 | -23.214 |
| 42. | BS009 | -4.070 | -4.070 | -26.925 | -27.120 |
| 43. | RR012 | -4.070 | -4.114 | -34.223 | -26.048 |
| 44. | BS006 | -4.069 | -4.069 | -29.064 | -25.549 |
| 45. | RR008 | -4.064 | -4.084 | -32.471 | -26.373 |
| 46. | RG013 | -4.050 | -4.050 | -34.566 | -28.144 |
| 47. | RP009 | -4.044 | -4.085 | -27.167 | -19.822 |
| 48. | BP003 | -4.040 | -4.040 | -34.064 | -27.935 |
| 49. | RR055 | -4.032 | -4.043 | -26.118 | -20.382 |
| 50. | BL014 | -4.025 | -4.191 | -26.492 | -18.503 |
| 51. | RL002 | -4.021 | -4.024 | -29.147 | -23.600 |

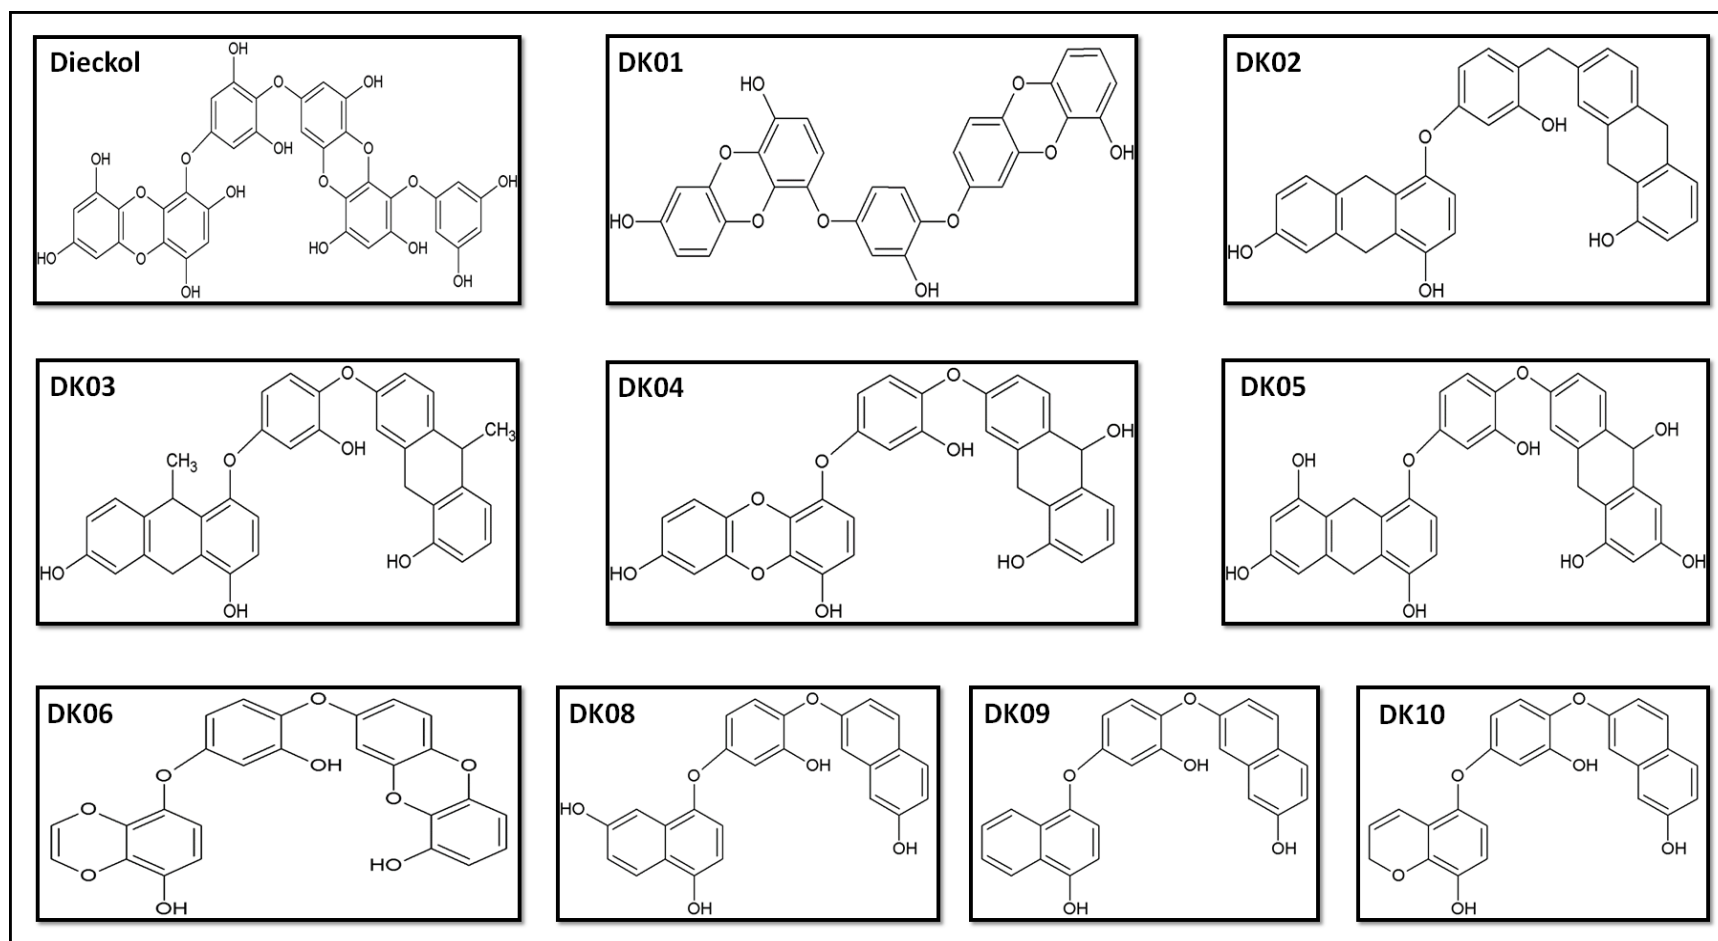

**Supplementary Figure S1:** Two-dimensional structures of Dieckol and its derivatives (DK01-DK10) used in the study.
